# Supplementary material
Source: ML conference proceedings conference paper supplement (https://aclanthology.org/2021.acl-long.346)
Supplement: OptionalSupplementaryMaterial [file 2021.acl-long.346.OptionalSupplementaryMaterial.zip]

## Instructions:

1. Connect to the UMIACS VPN
2. Visit <http://quenya.umiacs.umd.edu:8080/projects/1/data> (it may take a while to load)
3. Click the blue “Label” button, you should see it like below

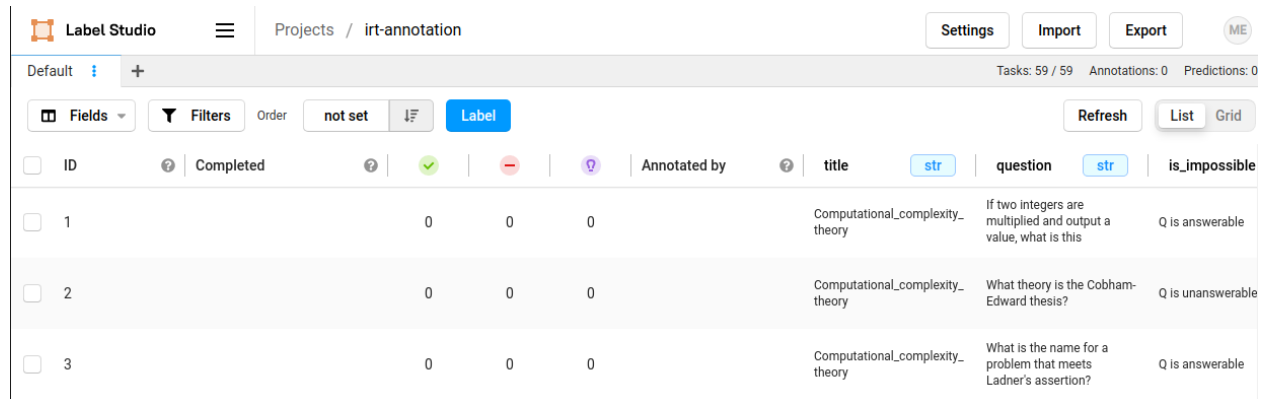

The screenshot shows the Label Studio web interface. At the top, there's a header with 'Label Studio', a menu icon, and the project path 'Projects / irt-annotation'. On the right, there are buttons for 'Settings', 'Import', 'Export', and a user profile icon 'ME'. Below the header, a status bar shows 'Tasks: 59 / 59', 'Annotations: 0', and 'Predictions: 0'. The main area has a toolbar with 'Fields', 'Filters', 'Order', 'not set', a 'Label' button, 'Refresh', 'List', and 'Grid'. Below this is a table with columns: ID, Completed, and three status icons (green check, red minus, purple exclamation mark). The table lists three tasks, all with '0' in the status columns. The 'title' column contains 'Computational\_complexity\_theory' for all three. The 'question' column contains different questions related to computational complexity. The 'is\_impossible' column contains 'Q is answerable', 'Q is unanswerable', and 'Q is answerable' respectively.

| ID | Completed |   |   |  | Annotated by | title                           | question                                                        | is_impossible     |
|----|-----------|---|---|--|--------------|---------------------------------|-----------------------------------------------------------------|-------------------|
| 1  | 0         | 0 | 0 |  |              | Computational_complexity_theory | If two integers are multiplied and output a value, what is this | Q is answerable   |
| 2  | 0         | 0 | 0 |  |              | Computational_complexity_theory | What theory is the Cobham-Edward thesis?                        | Q is unanswerable |
| 3  | 0         | 0 | 0 |  |              | Computational_complexity_theory | What is the name for a problem that meets Ladner's assertion?   | Q is answerable   |

## Guidelines:

In this annotation task you are marking two things:

1. Is the SQuAD question valid?
  - a. If it is valid, mark it “correct”
  - b. If it is not valid, mark it “wrong”
  - c. If it is not entirely wrong, but also not correct, mark it “flawed”
2. What properties does the SQuAD question have, especially when it is “wrong”?

### Example 1:

Question: In what year did George Washington become president?

Context: <paragraph that contains this information>

Answer: “Not Answerable”

You should label this as:

“Wrong” and “is\_answerable” because: The question is wrong, because although it says the question is \*not\* answerable, it actually is\_answerable

### Example 2:

Question: Name three elements on the periodic table.

Context: <paragraph that contains two elements on periodic table>

Answer: <answer that contains two elements>

You should label this as:

“Wrong” and “answer\_set\_incomplete”: the answer is incorrect since it includes only two of the three requested elements, because the answer set is incomplete.

### Example 3:

Question: Who is the first president of the US?

Answer: George

If:

- The context unambiguously refers to “George” as George Washington, then “correct” and “incomplete\_answer”
- Otherwise, this should be “wrong”
